# Supplementary material for: Liver Disease as a Predictor of New‐Onset Atrial Fibrillation
Source: PubMed Central journal article supplement — J Am Heart Assoc. 2018 Jul 24;7(15):e008703. doi: 10.1161/JAHA.118.008703 (PMC6201455; doi:10.1161/jaha.118.008703), 2018-07-24
Supplement: JAH3-7-e008703-s001.pdf [file JAH3-7-e008703-s001.pdf]

# **SUPPLEMENTAL MATERIAL**

**Table S1. Percentage of Patients with Missing Variables.**

| <b>Variable</b>                      | <b>Percent Missing</b> |
|--------------------------------------|------------------------|
| Age                                  | 0                      |
| Male                                 | 0                      |
| BMI                                  | 26.6                   |
| Race                                 | 1.3                    |
| Portal Hypertension                  | 0                      |
| Hepatitis C                          | 0                      |
| NASH (non alcoholic steatohepatitis) | 0                      |
| Alcohol Abuse                        | 0                      |
| Primary Liver Cancer                 | 0                      |
| Hemodynamic Instability              | 0                      |
| Sleep Apnea                          | 0                      |
| Diabetes                             | 0                      |
| Hypertension                         | 0                      |
| Stroke                               | 0                      |
| Ischemic and/or Hemorrhagic Stroke   | 0                      |
| Ischemic Stroke                      | 0                      |
| Hemorrhagic Stroke                   | 0                      |
| Coronary Artery Disease              | 0                      |
| Severe Valvular Disease              | 0                      |
| Diastolic Dysfunction                | 0                      |
| LV Ejection Fraction                 | 5.8                    |
| Reduced LV Ejection Fraction (<50%)  | 5.8                    |
| LA Moderate or Severe Enlargement    | 0                      |
| LA Volume (mL)                       | 33.2                   |
| LV hypertrophy                       | 0                      |
| CHADS2VASc Score                     | 0                      |
| HAS-BLED Score                       | 1.5                    |
| MELD Score                           | 1.5                    |
| Abnormal TSH                         | 68                     |
| Abnormal Potassium/Magnesium         | 16                     |
| Beta Blocker Use                     | 0                      |
| Class 1 Anti-arrhythmic Use          | 0                      |
| Amiodarone Use                       | 0                      |
| Digoxin                              | 0                      |

BMI: body mass index, LV: left ventricle, LA: left atrium, MELD: Model for End Stage Liver Disease, TSH: thyroid stimulating hormone

**Table S2. Univariable Analysis.**

| Characteristic                       | Hazard Ratios (95% C.I.) | P value |
|--------------------------------------|--------------------------|---------|
| Age                                  | 1.05 (1.03, 1.07)        | <0.001  |
| Male                                 | 1.29 (0.92, 1.8)         | 0.14    |
| BMI                                  | 1.01 (0.99, 1.03)        | 0.52    |
| White                                | 1.69 (1.23, 2.34)        | 0.001   |
| Portal Hypertension                  | 1.54 (1.1, 2.18)         | 0.013   |
| Hepatitis C                          | 0.94 (0.68, 1.32)        | 0.73    |
| NASH (non-alcoholic steatohepatitis) | 1.42 (1.01, 2)           | 0.042   |
| Alcohol Abuse                        | 1.41 (0.99, 2.01)        | 0.059   |
| Primary Liver Cancer                 | 1.27 (0.89, 1.83)        | 0.19    |
| Hemodynamic Instability              | 3.23 (2.09, 5)           | <0.001  |
| Sleep Apnea                          | 3.33 (1.62, 6.84)        | 0.001   |
| Diabetes                             | 1.65 (1.16, 2.35)        | 0.005   |
| Hypertension                         | 1.72 (1.22, 2.42)        | 0.002   |
| Severe Valvular Disease              | 7.34 (4.13, 13.05)       | <0.001  |
| Diastolic Dysfunction                | 1.35 (0.85, 2.13)        | 0.21    |
| LV Ejection Fraction                 | 0.004 (0, 0.02)          | <0.001  |
| Reduced LV Ejection Fraction (<50%)  | 2.40 (1.42, 4.04)        | 0.001   |
| LA Moderate or Severe Enlargement    | 3.06 (1.89, 4.95)        | <0.001  |
| LA Volume (mL)                       | 1.01 (1, 1.02)           | 0.002   |
| LV hypertrophy                       | 2.54 (1.6, 4.02)         | <0.001  |
| MELD Score                           | 1.09 (1.07, 1.11)        | <0.001  |
| 11-20                                | 2.55 (1.38, 2.97)        | <0.001* |
| 21-30                                | 5.68 (5.91, 4.72)        | *       |
| >30                                  | 13.21 (10.85, 29.5)      | *       |
| Abnormal TSH                         | 0.87 (0.48, 1.58)        | 0.65    |
| Abnormal Potassium/Magnesium         | 1.02 (0.65, 1.6)         | 0.95    |

\*p-value for the overall model containing MELD groups 11-20, 21-30, >30 with MELD group 1-10 used as the reference category. BMI: body mass index, LV: left ventricle, LA: left atrium, MELD: Model for End Stage Liver Disease, TSH: thyroid stimulating hormone

**Table S3. Patient Characteristics With and Without Atrial Fibrillation.**

| Characteristic                               | No AF       | AF          | P value |
|----------------------------------------------|-------------|-------------|---------|
| Age, years                                   | 51.8 ± 13.0 | 55.0 ± 8.9  | <0.001  |
| Male                                         | 938 (59.4)  | 96 (64.4)   | 0.228   |
| BMI                                          | 27.81 ± 7.1 | 29.2 ± 7.7  | 0.023   |
| White                                        | 589 (37.3)  | 79 (53.0)   | <0.001  |
| Portal Hypertension                          | 31.0        | 33.5        | 0.56    |
| Hepatitis C                                  | 11.2        | 12.7        | 0.49    |
| Non-alcoholic steatohepatitis                | 20.7        | 19.5        | 0.79    |
| Alcohol Abuse                                | 0.0         | 0.0         | NA      |
| Primary Liver Cancer                         | 11.4        | 6.6         | 0.032   |
| Hemodynamic Instability                      | 15.2        | 10.4        | 0.045   |
| Sleep Apnea                                  | 1.0         | 2.3         | 0.014   |
| Diabetes                                     | 12.1        | 12.2        | 0.92    |
| Hypertension                                 | 16.0        | 15.4        | 0.90    |
| Severe Valvular Disease                      | 1.4         | 3.3         | 0.006   |
| Diastolic Dysfunction                        | 45.5        | 57.4        | 0.12    |
| LV Ejection Fraction                         | 60.9 ± 7.8  | 59.3 ± 8.1  | 0.009   |
| Reduced LV Ejection Fraction (<50%)          | 6.1         | 5.1         | 0.64    |
| LA Moderate or Severe Enlargement            | 8.3         | 6.1         | 0.23    |
| LA Volume (mL)                               | 54.5 ± 26.5 | 61.1 ± 30.4 | 0.005   |
| LV hypertrophy                               | 8.2         | 6.9         | 0.49    |
| CHA <sub>2</sub> DS <sub>2</sub> -VASc Score | 1.16 ± 1.08 | 1.06 ± 1    | 0.16    |
| MELD Score                                   | 15.0 ± 6.7  | 16.1 ± 7.1  | 0.027   |
| Abnormal TSH                                 | 100.6       | 84.0        | 0.20    |
| Abnormal Potassium/Magnesium                 | 68.5        | 54.2        | 0.045   |

Values are mean ± SD, n (%), or the number of new events per 100 person-years of follow-up. Continuous variables are time averaged values. BMI: body mass index, LV: left ventricle, LA: left atrium, MELD: Model for End Stage Liver Disease, TSH: thyroid stimulating hormone

**Table S4. Multivariable Cox proportional hazard ratios obtained using non-imputed data to evaluate factors associated with new onset AF.**

| <b>Variable</b>                            | <b>HR</b> | <b>Lower 95% CI</b> | <b>Upper 95% CI</b> | <b>P-value</b> |
|--------------------------------------------|-----------|---------------------|---------------------|----------------|
| <b>Diabetes</b>                            | 0.96      | 0.64                | 1.45                | 0.85           |
| <b>Hypertension</b>                        | 1.01      | 0.67                | 1.51                | 0.97           |
| <b>Age</b>                                 | 1.06      | 1.04                | 1.08                | <0.001         |
| <b>Male</b>                                | 1.1       | 0.76                | 1.58                | 0.62           |
| <b>Portal Hypertension</b>                 | 0.96      | 0.66                | 1.41                | 0.84           |
| <b>LA Enlargement</b>                      | 1.21      | 0.69                | 2.13                | 0.51           |
| <b>LV Hypertrophy</b>                      | 1.2       | 0.7                 | 2.05                | 0.51           |
| <b>Hemodynamic Instability</b>             | 1.8       | 1.09                | 2.98                | 0.02           |
| <b>Sleep Apnea</b>                         | 2.48      | 1.16                | 5.33                | 0.02           |
| <b>Reduced Ejection Fraction (&lt;50%)</b> | 2.71      | 1.5                 | 4.91                | 0.001          |
| <b>Valvular Heart Disease</b>              | 2.67      | 1.26                | 5.66                | 0.01           |
| <b>MELD Group 11-20</b>                    | 2.87      | 1.75                | 4.7                 | <0.001         |
| <b>MELD Group 21-30</b>                    | 6.51      | 3.62                | 11.72               | <0.001         |
| <b>MELD Group &gt;30</b>                   | 11.98     | 5.1                 | 28.15               | <0.001         |

MELD: Model for End Stage Liver Disease; LA: left atrium; LV: left ventricle; HR: hazard ratio; CI: confidence interval

**Table S5. Ischemic Stroke Risk by MELD category.**

| <b>Characteristic</b>    | <b>Hazard Ratios (95% C.I.)</b> | <b>P value</b> |
|--------------------------|---------------------------------|----------------|
| <b>MELD Score 11-20</b>  | 1.25 (0.56, 2.8)                | <0.001*        |
| <b>MELD Score 21-30</b>  | 2.89 (1.26, 6.61)               |                |
| <b>MELD Score &gt;30</b> | 15.79 (6.12, 40.72)             |                |

\*P-value for the overall model containing MELD groups 11-20, 21-30, >30 with MELD group 1-10 used as the reference category.

**Table S6. Hemorrhagic Stroke Risk by MELD category.**

| <b>Characteristic</b>    | <b>Hazard Ratios (95% C.I.)</b> | <b>P value</b> |
|--------------------------|---------------------------------|----------------|
| <b>MELD Score 11-20</b>  | 1.90 (0.41, 8.74)               | <0.001*        |
| <b>MELD Score 21-30</b>  | 9.87 (2.32, 42)                 |                |
| <b>MELD Score &gt;30</b> | 65.76 (14.28, 302.88)           |                |

\*P-value for the overall model containing MELD groups 11-20, 21-30, >30 with MELD group 1-10 used as the reference category.
